# Supplementary material
Source: HighWire-hosted journal article supplement (https://cmaj.ca/content/suppl/2008/01/14/178.2.149)
Supplement: youthfact-f.pdf [file youthfact-f.pdf]

## FICHE D'INFORMATION DU JAMC

## L'usage de l'alcool et des drogues chez les adolescents

## Dans quelle mesure l'usage des drogues est-il répandu chez les adolescents au Canada?

D'après le sondage sur l'usage des drogues par les élèves de l'Ontario (1997–2007), l'alcool est la substance la plus répandue chez les adolescents : environ les deux tiers des adolescents ont déclaré avoir bu de l'alcool au cours de l'année précédant le sondage et un adolescent sur cinq a bu de façon à s'exposer à des problèmes de santé, de travail scolaire ou d'autre nature. Le sondage a aussi révélé que la deuxième drogue la plus répandue est le cannabis (aussi appelé marijuana, pot ou mari). Environ le tiers des adolescents canadiens sondés ont déclaré avoir fait usage du cannabis au cours de l'année précédant le sondage. Les autres drogues comme l'ecstasy, le LSD, la cocaïne et la cristal méthamphétamine étaient beaucoup moins répandues : environ un élève sur 20 a déclaré en avoir fait usage au cours de la période en cause. Le sondage a indiqué que le tiers des adolescents ont déclaré ne faire usage d'aucune drogue (y compris le tabac et l'alcool).

Dans un rapport de 2007, le Centre canadien de lutte contre l'alcoolisme et les toxicomanies a indiqué que certains adolescents risquaient plus que d'autres d'avoir des problèmes d'alcool ou de drogue, ce qui comprenait les adolescents dont un membre de la famille avait un problème de drogue ou d'alcool, ceux qui avaient des troubles de santé mentale comme la dépression et l'anxiété, ceux qui avaient des démêlés avec la justice ou ceux qui vivaient dans la rue.

## À quel âge les adolescents commencent-ils à faire l'essai des drogues ou de l'alcool?

Une enquête menée en 2004–2005 par Santé Canada a révélé que les élèves de la 7<sup>e</sup> à la 9<sup>e</sup> année déclarent en avoir fait usage pour la première fois à 11 ans dans le cas de l'alcool et à un peu moins de 13 ans dans celui du canna-

bis. Certains adolescents feront “des essais”, mais d'autres feront usage de ces substances beaucoup plus régulièrement et finiront par avoir des problèmes de drogue ou d'alcool.

## Quels signes et symptômes indiquent l'existence possible de problèmes d'alcool ou de drogue?

L'encadré 1 résume les signes qui peuvent indiquer qu'il y a usage d'alcool ou de drogue, mais certains de ces effets ou comportements peuvent être un signe d'autres problèmes. Il importe de demander l'aide d'un médecin de famille, d'un pédiatre ou d'un conseiller scolaire si vous soupçonnez qu'un adolescent commence à avoir des difficultés avec l'alcool ou les drogues.

## Qu'est-ce que je peux faire si je soupçonne qu'un adolescent fait usage de drogues?

Il faut commencer par lui parler. Il importe de ne pas l'accuser de quoi que ce soit. Il faut plutôt lui signaler que le comportement troublant vous préoccupe et demander à l'intéressé s'il se pourrait qu'il fasse usage de drogues ou d'alcool. Si vous êtes l'ami d'un adolescent qui nie faire usage de drogues ou de l'alcool, il faut parler à ses parents ou à un enseignant. Si vous êtes le parent de l'adolescent, il faut lui répéter que sa santé et son mieux-être vous préoccupent et surveiller ensuite son comportement à la maison et à l'école. Il importe d'encourager les adolescents qui montrent des signes de problèmes d'alcool ou de drogue à consulter un médecin ou un conseiller qui a de l'expérience du travail auprès des adolescents.

## Où trouver plus de renseignements sur les drogues et l'usage des drogues chez les adolescents?

Il y a de nombreuses ressources où les parents et les adolescents peuvent trouver de l'information sur le tabac, l'alcool et d'autres drogues.

## Encadré 1 : Signes et symptômes indiquant qu'un adolescent peut avoir un problème d'alcool ou de drogue

## Vie familiale ou sociale

- Voler de l'argent et voler et vendre des objets précieux (pour acheter des drogues)
- Se retirer des activités familiales habituelles
- Arriver souvent en retard à la maison
- Ne pas dire à un membre de la famille où il va.
- Avoir des problèmes avec la loi

## Vie scolaire

- Chute des résultats scolaires, mauvais rendement scolaire
- Manquer ou sauter des cours
- Dormir en classe
- Ne pas faire ses devoirs
- Laisser tomber les sports ou d'autres activités parascolaires
- Avoir des problèmes de mémoire et de concentration

## Vie affective

- Avoir des sautes d'humeur et des comportements inexplicables
- Se sentir malheureux ou déprimé
- Se sentir soupçonneux ou anxieux

## Vie physique

- Avoir les yeux rouges
- Avoir une toux ou un embarras de la respiration nasale qui persiste
- Être constamment fatigué
- Perdre ou prendre du poids
- Avoir des changements d'appétit

Les ressources utiles comprennent le Centre des toxicomanies et de santé mentale ([www.camh.net/fr/index.html](http://www.camh.net/fr/index.html)), Parent Action on Drugs ([www.parentactionondrugs.org/index.php](http://www.parentactionondrugs.org/index.php)), le Réseau canadien de la santé ([www.reseau-canadien-sante.ca](http://www.reseau-canadien-sante.ca)), Global Youth Voices ([www.globalyouthvoices.org](http://www.globalyouthvoices.org)) et Jeunesse, j'écoute ([www.jeunessejecoute.ca](http://www.jeunessejecoute.ca); 800 668-6868).

## Karen Leslie MD

Division de la médecine des adolescents et Département de pédiatrie  
Hospital for Sick Children  
Toronto (Ont.)

Intérêts concurrents: Aucun déclaré.
